# Supplementary material for: Self-healing and anti-oxidative mucus-inspired hydrogel
Source: Royal Society of Chemistry journal article supplement (doi:10.1039/d4py01042f), 2024-12-13
Supplement: d4py01042f1.pdf [file d4py01042f1.pdf]

## Supporting Information

### **Self-healing and anti-oxidative mucus-inspired hydrogel**

Chunwen Tao,<sup>†a</sup> Liyuan Peng,<sup>†a</sup> Qiuyun Shao,<sup>a</sup> Kaihui Nan,<sup>\*a</sup> Ravin Narain,<sup>\*b</sup>  
Yangjun Chen<sup>\*a</sup>

<sup>a</sup>National Engineering Research Center of Ophthalmology and Optometry, Institute of Biomedical Engineering, School of Ophthalmology & Optometry, Eye Hospital, Wenzhou Medical University, Wenzhou, Zhejiang 325027, China

<sup>b</sup>Department of Chemical and Materials Engineering, College of Natural and Applied Sciences, University of Alberta, Edmonton, Alberta T6G 2G6, Canada

<sup>†</sup>These two authors contributed equally to this work.

\*Corresponding Author

E-mail: [nankh@wmu.edu.cn](mailto:nankh@wmu.edu.cn) (K.N.); [narain@ualberta.ca](mailto:narain@ualberta.ca) (R.N.); [chenyj@wmu.edu.cn](mailto:chenyj@wmu.edu.cn) (Y.C.)

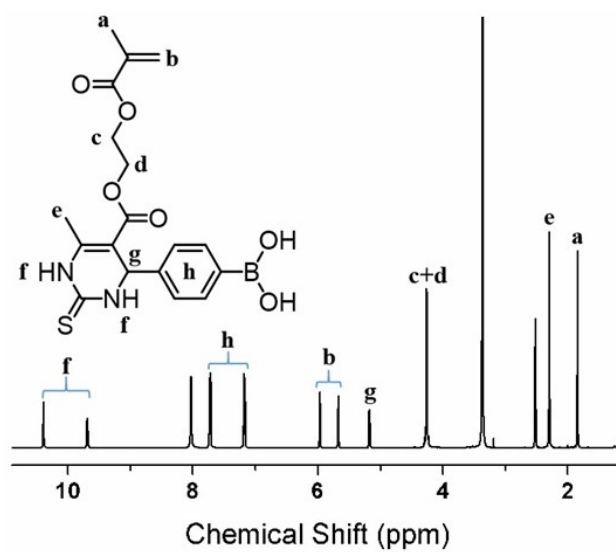

**Figure S1.** <sup>1</sup>H NMR spectrum of PBA-DHPM monomer.

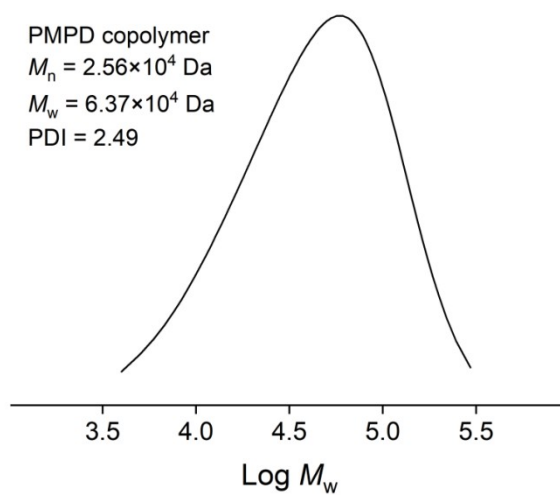

**Figure S2.** GPC curve of PMPD copolymer measured by aqueous GPC.

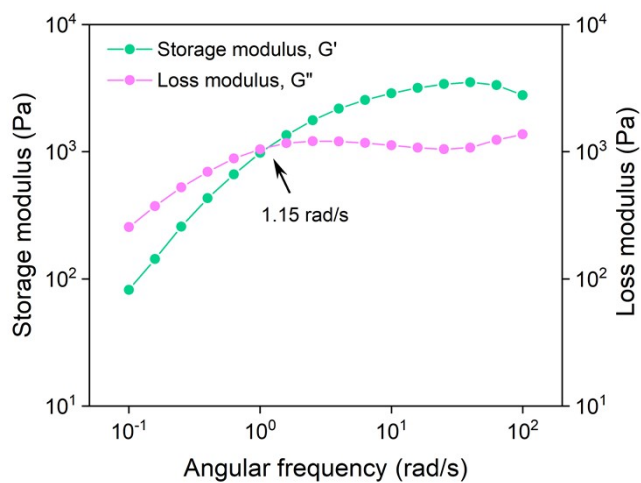

**Figure S3.** Frequency sweep (0.1-100 rad/s) of P1M1 gel at a fixed strain of 1%.

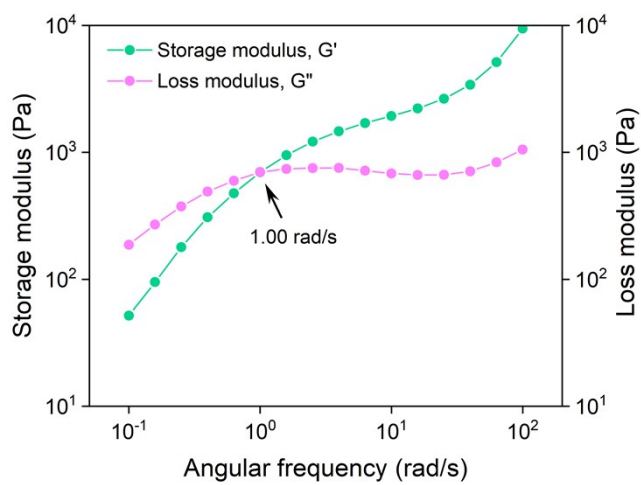

**Figure S4.** Frequency sweep (0.1-100 rad/s) of P2M1 gel at a fixed strain of 1%.

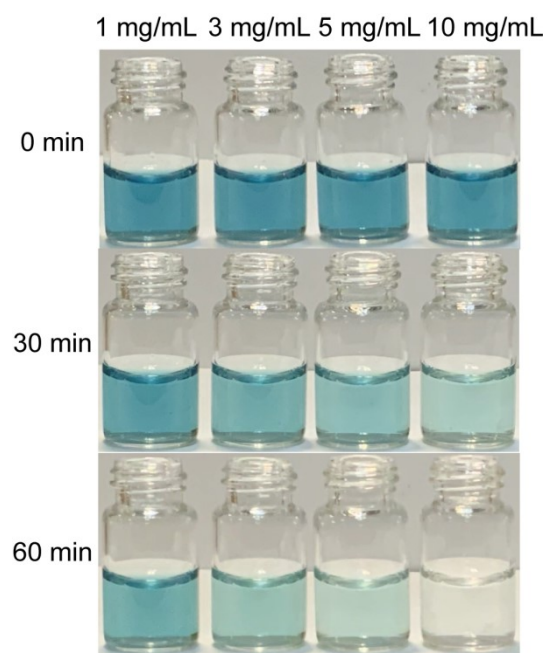

**Figure S5.** Photographs of  $ABTS^{+}$  solutions after co-incubation with different amount of PMPD copolymer (1, 3, 5, and 10 mg/mL) at (i) 0 min, (ii) 30 min, and (iii) 60 min.

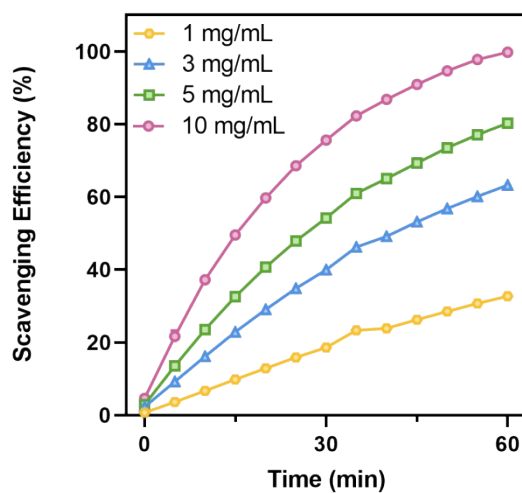

**Figure S6.**  $ABTS^{+}$  scavenging efficiency of PMPD copolymer.

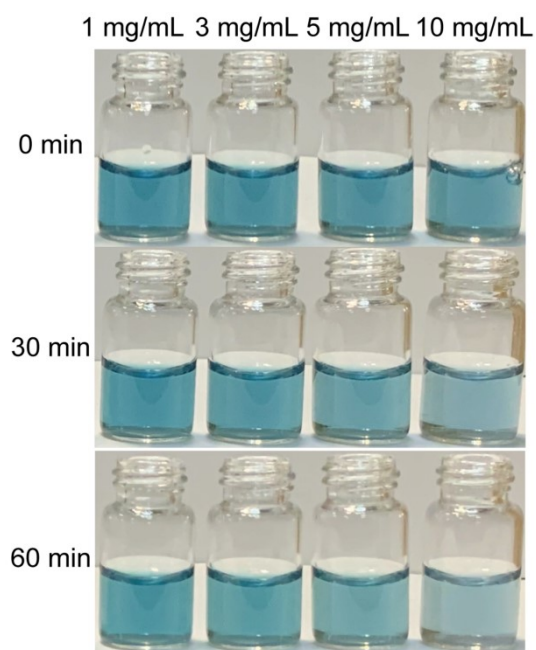

**Figure S7.** Photographs of ABTS<sup>+</sup> solutions after co-incubation with different amount of mucin (1, 3, 5, and 10 mg/mL) at (i) 0 min, (ii) 30 min, and (iii) 60 min.

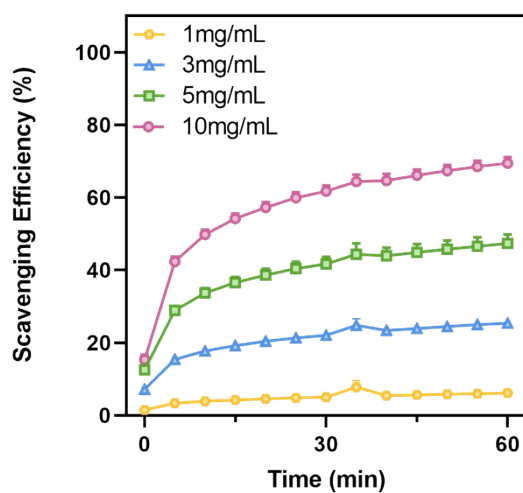

**Figure S8.** ABTS<sup>+</sup> scavenging efficiency of natural mucin.

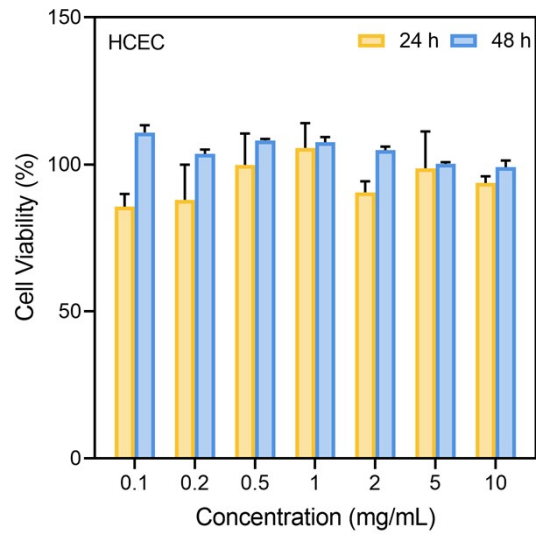

**Figure S9.** Cell viability of HCEC cells after co-incubation with different concentrations (0.1, 0.2, 0.5, 1, 2, 5, and 10 mg/mL) of PMPD copolymer.

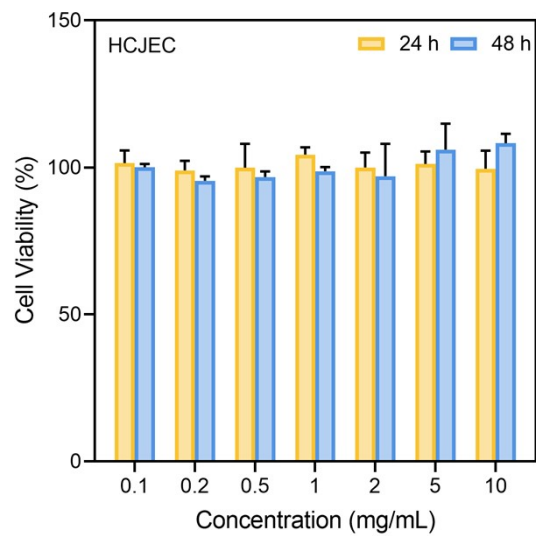

**Figure S10.** Cell viability of HCJEC cells after co-incubation with different concentrations (0.1, 0.2, 0.5, 1, 2, 5, and 10 mg/mL) of PMPD copolymer.

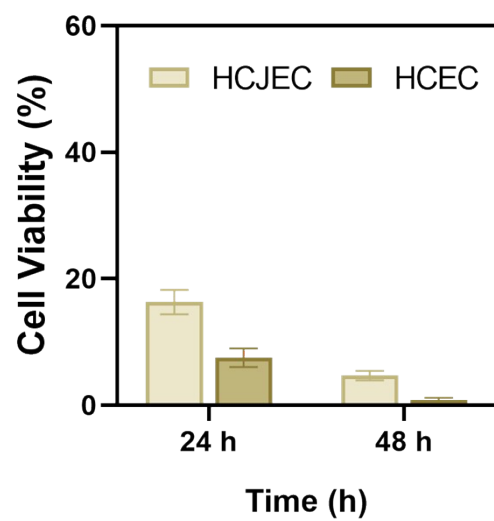

**Figure S11.** Cell viability of HCEC and HCJEC cells after co-incubation with culture medium containing 10% DMSO for 24 and 48 h.
